# Supplementary material
Source: MDPI journal article supplement (https://www.mdpi.com/2073-8994/12/5/808)
Supplement: s1 [file s1]

Supplementary Information

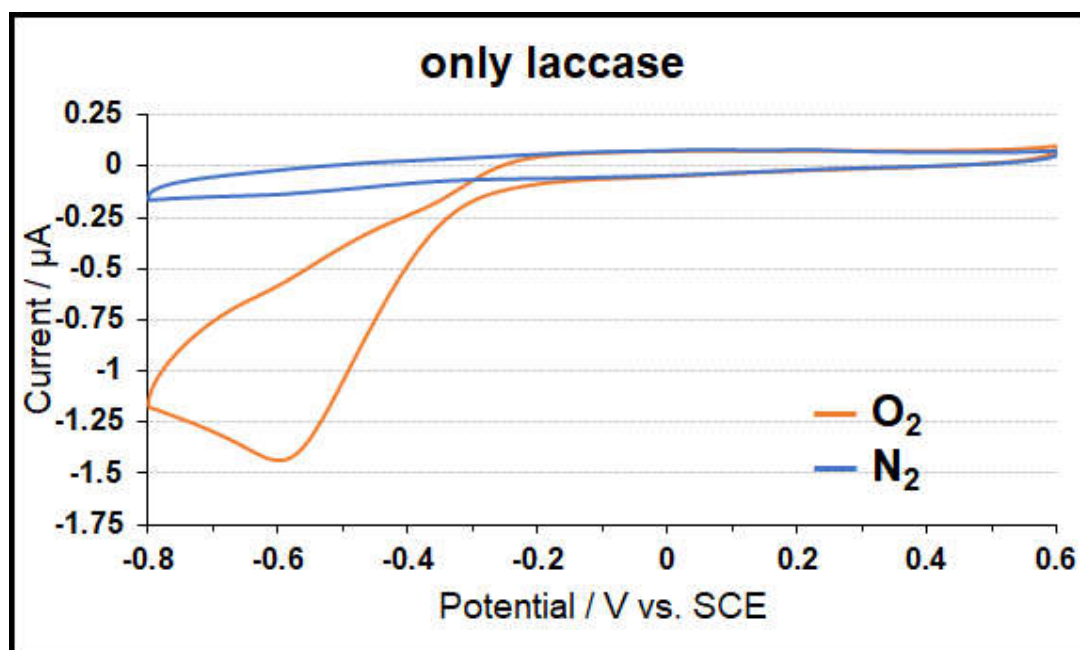

**Figure S1.** CV for only laccase (orange: Under oxygen, blue: Under nitrogen). Comparing with typical values reported (for example, H.; Yun, G.; Pannpan, *J. Material. Chem. A*, **2015**, 3, 11511), the present Type-1 copper reduction peak was reasonable.

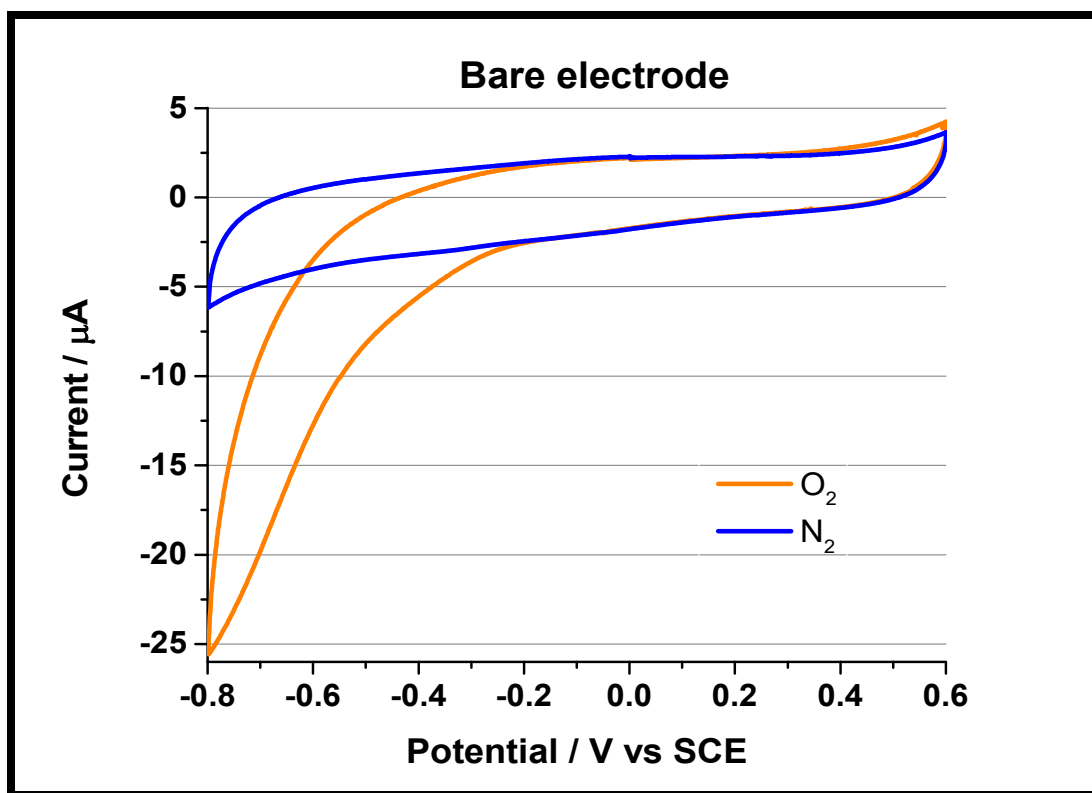

Figure S2. CV of a bare GC electrode in the same experimental conditions used for the measurements of Figure.S1 (orange: Under oxygen, blue: Under nitrogen).
